# Supplementary material for: Parylene copolymer gate dielectrics for organic field-effect transistors
Source: Royal Society of Chemistry journal article supplement (doi:10.1039/c8tc06267f), 2019-01-01
Supplement: c8tc06267f1.pdf [file c8tc06267f1.pdf]

## Electronic Supplementary Information

# Parylene Copolymer Gate Dielectrics for Organic Field-Effect Transistors

*Hyunjin Park,<sup>a,b</sup> Jimin Kwon,<sup>c</sup> Hyungju Ahn<sup>d</sup> and Sungjune Jung<sup>\*,c</sup>*

<sup>a</sup>Department of Electrical Engineering, Pohang University of Science and Technology  
(POSTECH), 77 Cheongam-Ro, Nam-Gu, Pohang, 37673, Republic of Korea

<sup>b</sup>Advanced Materials Division, Korea Research Institute of Chemical Technology, 141 Gajeong-  
Ro, Yuseong-Gu, Daejeon, 34114, Republic of Korea

<sup>c</sup>Department of Creative IT Engineering, Pohang University of Science and Technology  
(POSTECH), 77 Cheongam-Ro, Nam-Gu, Pohang, 37673, Republic of Korea

<sup>d</sup>Pohang Accelerator Laboratory, 77 Cheongam-Ro, Nam-Gu, Pohang, 37673, Republic of Korea

\***E-mail:** [sjjung@postech.ac.kr](mailto:sjjung@postech.ac.kr)

## Experimental Details

**Materials:** The parylene C (diX-C, Daisankasei Co., Ltd.) and F (VT4, Suzhou Chireach Biomedical Technology Co., LTD.) were prepared for gate dielectrics. For the bank solution, Cytop (CTL-809M, Asahi Glass) was dissolved in fluorinate solvent (CT-Solv.180, Asahi Glass) at a volume ratio of 1:2. The semiconductor solution was prepared with a blend of 2.5 mg ml<sup>-1</sup> TIPS-pentacene (>99.9 %, Ossila) and 1.25 mg ml<sup>-1</sup> polystyrene (PS) (M<sub>w</sub> ~280,000, Sigma-Aldrich) dissolved in mesitylene (98 %, Sigma-Aldrich).

**Characterization:** The concentration of chlorine and fluorine atoms was measured by SIMS (IMS 6F, Cameca). The thickness of parylene thin films was measured using a stylus surface profiler (DektakXT, Bruker). The capacitance of MIM capacitors was measured with a precision LCR meter (ZM2376, NF Corporation) within the frequency range of 1 Hz to 1 MHz. The electrical characteristics of OFETs were measured with a semiconductor parameter analyzer (4200-SCS, Keithley) under ambient conditions inside a dark box. AFM images were recorded in tapping mode using an SPM system (Veeco Dimension 3100 + Nanoscope V, Digital Instruments/Veeco Metrology Group). The crystalline of TIPS-pentacene thin films was recorded by POM (Leica DM2700M, Leica). 2D GIXRD measurements were performed at the 3C beamline ( $\lambda = 1.37 \text{ \AA}$ ) of the Pohang Acceleration Laboratory in Korea.

**OFET Fabrication:** BGTC OFETs were fabricated on glass substrates (Eagle XG, Corning). A 50 nm thick aluminum gate electrode was thermally evaporated through a shadow mask on the substrate. The parylene gate dielectric was deposited by means of CVD. The temperature of the vaporizer was maintained at 65 and 75 °C for 30 min in each step. During CVD, the temperature

of the pyrolysis furnace was maintained at 690 °C to decompose of parylene dimers to monomers. Cytop solution was printed using a dispenser (350PC, Musashi Engineering, Inc.) to form the bank, followed by thermal annealing at 100 °C for 10 min on a hotplate to remove residual solvent. The substrate and nozzle temperatures were maintained at 40 °C during the dispenser patterning process. The semiconductor solution was printed onto the area defined by the banks using the dispenser, followed by thermal annealing at 70 °C for 10 min on a hotplate for crystallization of TIPS-pentacene thin film and removal of residual solvent. The substrate and nozzle temperatures were maintained at 30 °C during the dispenser patterning process. Finally, a 40 nm thick silver was thermally evaporated through a shadow mask for source and drain electrodes with channel width and length of 1000 and 50  $\mu\text{m}$ , respectively.

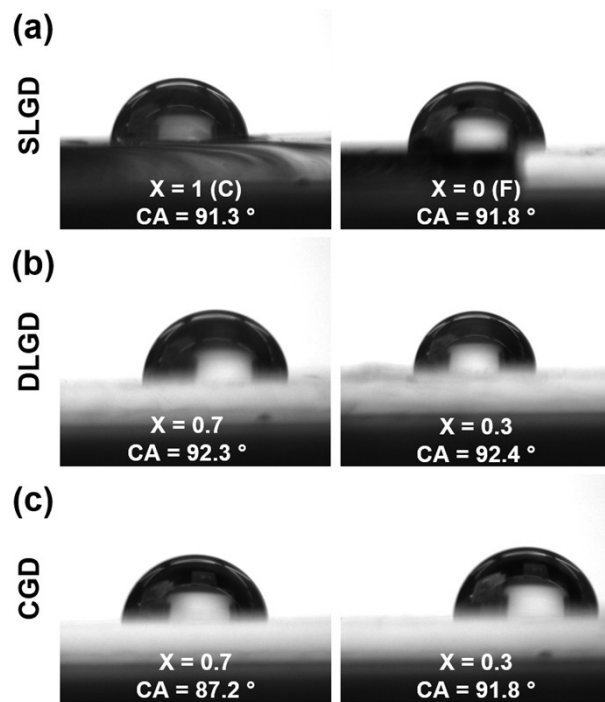

**Fig. S1** Contact angle of DI water prepared on parylene (a) SLGDs, (b) DLGDs, and (c) CGDs.

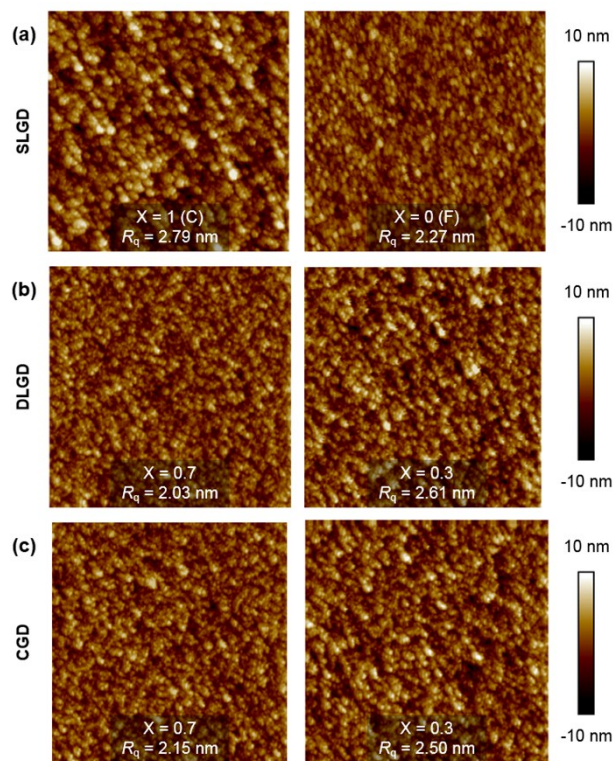

**Fig. S2** AFM images of parylene (a) SLGDs, (b) DLGDs, and (c) CGDs in an area of  $5 \mu\text{m} \times 5 \mu\text{m}$ .

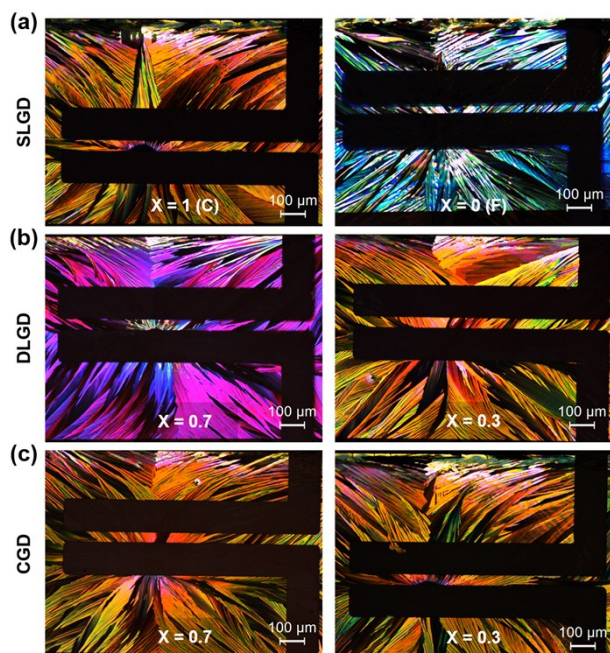

**Fig. S3** POM images of TIPS-pentacene thin films deposited on parylene (a) SLGDs, (b) DLGDs, and (c) CGDs.

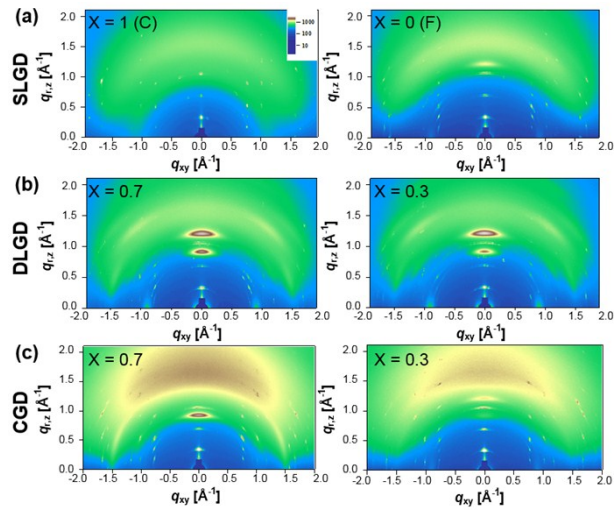

**Fig. S4** 2D GIXRD patterns of TIPS-pentacene thin films deposited on parylene (a) SLGDs, (b) DLGDs, and (c) CGDs.

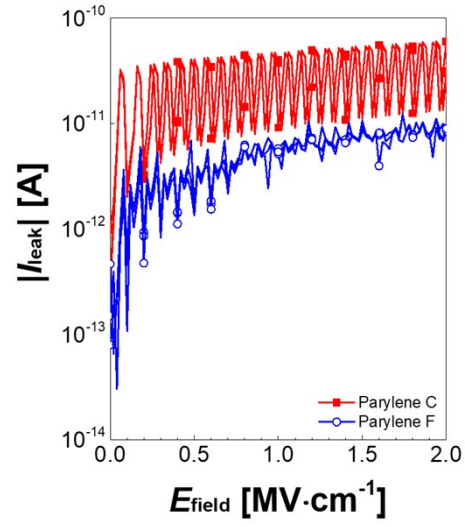

**Fig. S5** Leakage currents of MIM capacitors using parylene C (red solid symbols) and F (blue open symbols) thin films.



**Table S1 Dielectric and electrical parameters of parylene SLGDs, DLGDs, and CGDs.**

| $X =$<br>$w_C (w_C + w_F)^{-1}$ | $t_d$<br>[nm] | $\epsilon_r$<br>at 10 Hz | $\mu_{FET}$<br>[cm <sup>2</sup> V <sup>-1</sup> s <sup>-1</sup> ] | $E_{TH}$<br>[MV cm <sup>-1</sup> ] | $SS$<br>[V decade <sup>-1</sup> ] | $I_{on}/I_{off}$<br>[ $\times 10^6$ ] |                  |
|---------------------------------|---------------|--------------------------|-------------------------------------------------------------------|------------------------------------|-----------------------------------|---------------------------------------|------------------|
| SLGD                            | 1 (C)         | 162                      | 3.73                                                              | 0.14 $\pm$ 0.03                    | -0.11 $\pm$ 0.01                  | 0.43 $\pm$ 0.22                       | 15.6 $\pm$ 23.39 |
|                                 | 0 (F)         | 119                      | 2.12                                                              | 0.06 $\pm$ 0.01                    | -0.15 $\pm$ 0.04                  | 2.59 $\pm$ 1.17                       | 1.82 $\pm$ 1.05  |
| DLGD                            | 0.7           | 226                      | 3.32                                                              | 0.13 $\pm$ 0.04                    | -0.08 $\pm$ 0.01                  | 0.55 $\pm$ 0.45                       | 4.90 $\pm$ 2.34  |
|                                 | 0.5           | 284                      | 2.99                                                              | 0.12 $\pm$ 0.02                    | -0.10 $\pm$ 0.01                  | 0.65 $\pm$ 0.37                       | 6.27 $\pm$ 4.01  |
|                                 | 0.3           | 219                      | 2.64                                                              | 0.05 $\pm$ 0.01                    | -0.13 $\pm$ 0.02                  | 2.24 $\pm$ 0.64                       | 3.34 $\pm$ 3.05  |
| CGD                             | 0.7           | 175                      | 3.11                                                              | 0.13 $\pm$ 0.01                    | -0.10 $\pm$ 0.01                  | 0.72 $\pm$ 0.64                       | 7.50 $\pm$ 4.18  |
|                                 | 0.5           | 262                      | 2.92                                                              | 0.14 $\pm$ 0.03                    | -0.11 $\pm$ 0.01                  | 0.81 $\pm$ 0.45                       | 5.83 $\pm$ 4.69  |
|                                 | 0.3           | 183                      | 2.44                                                              | 0.14 $\pm$ 0.03                    | -0.11 $\pm$ 0.01                  | 1.27 $\pm$ 0.82                       | 4.94 $\pm$ 2.44  |

\*  $V_{TH} = E_{TH} \times t_d$

\* Averaged over ten devices.

**Table S2 The  $\tau$  and  $\beta$  for OFETs with parylene SLGDs, DLGDs, and CGDs.**

| $X = w_C (w_C + w_F)^{-1}$ |       | $\tau [\times 10^4 \text{ s}]$ | $\beta$         |
|----------------------------|-------|--------------------------------|-----------------|
| SLGD                       | 1 (C) | $10.2 \pm 1.4$                 | $0.65 \pm 0.03$ |
|                            | 0 (F) | $5.9 \pm 0.8$                  | $0.39 \pm 0.01$ |
| DLGD                       | 0.7   | $7.2 \pm 2.6$                  | $0.55 \pm 0.05$ |
|                            | 0.5   | $11.2 \pm 5.3$                 | $0.43 \pm 0.04$ |
|                            | 0.3   | $10.3 \pm 1.7$                 | $0.37 \pm 0.02$ |
| CGD                        | 0.7   | $9.7 \pm 3.0$                  | $0.72 \pm 0.06$ |
|                            | 0.5   | $10.3 \pm 2.8$                 | $0.71 \pm 0.03$ |
|                            | 0.3   | $9.1 \pm 1.4$                  | $0.65 \pm 0.01$ |

\* Averaged over five devices.
